# Supplementary material for: Solution-processed sulfur depleted Cu(In, Ga)Se2 solar cells synthesized from a monoamine–dithiol solvent mixture
Source: Royal Society of Chemistry journal article supplement (doi:10.1039/c6ta00533k), 2016-01-01
Supplement: c6ta00533k1.pdf [file c6ta00533k1.pdf]

## Supporting Information

### Solution-Processed Sulfur Depleted Cu(In, Ga)Se<sub>2</sub> Solar Cells Synthesized from a Monoamine-Dithiol Solvent Mixture

*Xin Zhao, Mingxuan Lu, Mark J Koeper, and Rakesh Agrawal\**

X. Zhao, M. Lu, M. J. Koeper, R. Agrawal  
School of Chemical Engineering  
Purdue University  
480 Stadium Mall Drive  
West Lafayette, IN 47907-2100, USA  
E-mail: agrawalr@purdue.edu

#### 1. Cation precursors preparation

##### Chemicals

Copper (I) selenide (Cu<sub>2</sub>Se, 99.95%, Aldrich), copper (II) acetate (Cu(OAc)<sub>2</sub>, 99.99%, Aldrich), copper (II) acetylacetonate (Cu(acac)<sub>2</sub>, 99.9%, Aldrich), copper (I) chloride (CuCl, 99.99%, Aldrich), indium (III) selenide (In<sub>2</sub>Se<sub>3</sub>, Aldrich), indium (III) acetate (In(OAc)<sub>3</sub>, 99.99%, Aldrich), indium (III) acetylacetonate (In(acac)<sub>3</sub>, 99.99%, Aldrich), indium (III) chloride (InCl<sub>3</sub>, 99.999%, Aldrich), gallium (III) acetylacetonate (Ga(acac)<sub>3</sub>, 99.99%, Aldrich), gallium (III) chloride (GaCl<sub>3</sub>, 99.99%, Aldrich), gallium(III) iodide (GaI<sub>3</sub>, 99.99%, Aldrich), hexylamine (99%, Aldrich), 1,2-ethanedithiol (98%, Aldrich), and selenium powder (99.99%, Aldrich).

##### Solutions

Both monoamine-monothiol and monoamine-dithiol mixtures can be used to dissolve a variety of metal cation sources. As shown in Figure 1a, 0.2 mmol of GaI<sub>3</sub>, Ga(acac)<sub>3</sub>, GaCl<sub>3</sub>, Cu(OAc)<sub>2</sub>, Cu(acac)<sub>2</sub>, CuCl, In(OAc)<sub>3</sub>, In(acac)<sub>3</sub>, InCl<sub>3</sub>, 0.4 mmol of Cu<sub>2</sub>Se, and ~0.1 mmol of In<sub>2</sub>Se<sub>3</sub> were dissolved in 2 mL solvent mixture of monoamine-dithiol (HA-EDT, vol/vol = 10:1) respectively (Figure S1 a). All the metal salts except metal chalcogenides can easily dissolve in a monoamine-monothiol mixture (HA-PT, vol/vol = 4:1) as well (Figure 1b). 0.2 mmol of GaI<sub>3</sub>, Ga(acac)<sub>3</sub>, GaCl<sub>3</sub>, Cu(OAc)<sub>2</sub>, CuCl, Cu(acac)<sub>2</sub>, In(OAc)<sub>3</sub>, In(acac)<sub>3</sub>, InCl<sub>3</sub> were dissolved in 2 mL HA-PT solvent mixture (vol/vol = 4:1) respectively. The dissolution

process was performed in a N<sub>2</sub> glovebox with oxygen and moisture levels less than 0.1 ppm at room temperature.

Table S1. Solubility limits of metal salts and metal selenides in monoamine-dithiol (HA-EDT, vol/vol = 10:1) mixture and monoamine-monothiol mixture (HA-PT, vol/vol = 4:1) (20-25 °C, 1 atm)

|                                 | HA-EDT (vol/vol = 10:1) | HA-PT (vol/vol = 4:1) |
|---------------------------------|-------------------------|-----------------------|
| GaI <sub>3</sub>                | 0.48 M                  | 0.62 M                |
| Ga(acac) <sub>3</sub>           | 0.51 M                  | 0.37 M                |
| GaCl <sub>3</sub>               | 0.71 M                  | 0.83 M                |
| Cu(OAc) <sub>2</sub>            | 0.16 M                  | 0.77 M                |
| Cu(acac) <sub>2</sub>           | 0.18 M                  | 0.67 M                |
| CuCl                            | 1.00 M                  | 0.50 M                |
| Cu <sub>2</sub> Se              | 0.50 M                  | -                     |
| In <sub>2</sub> Se <sub>3</sub> | ~ 0.05 M                | -                     |
| In(OAc) <sub>3</sub>            | 0.37 M                  | 0.09 M                |
| In(acac) <sub>3</sub>           | 0.50 M                  | 0.10 M                |
| InCl <sub>3</sub>               | 0.61 M                  | 0.42 M                |

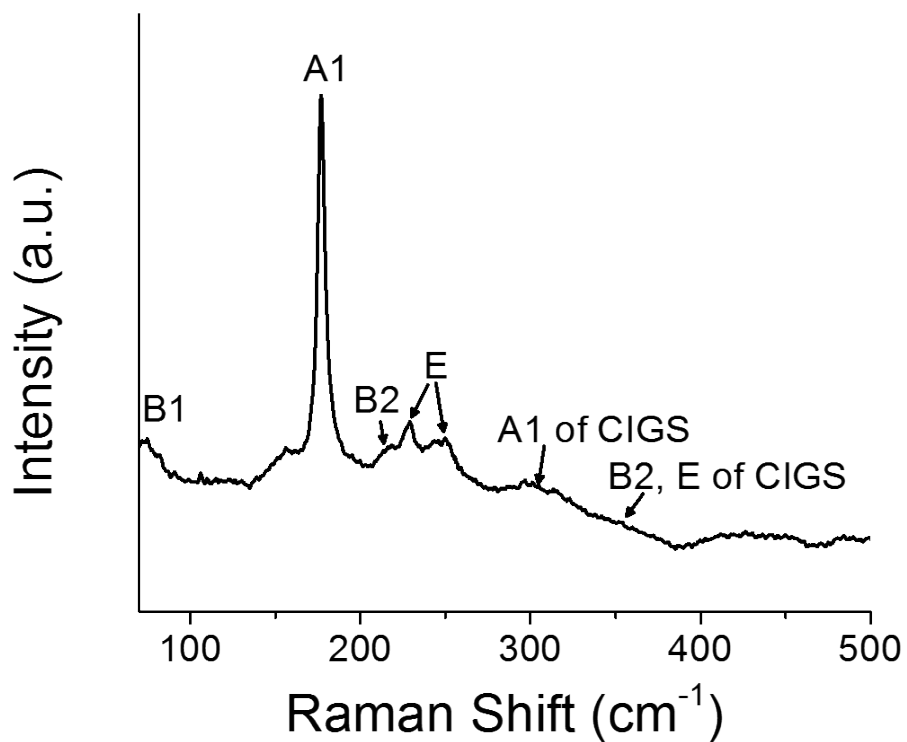

Figure S1. Raman spectrum of a selenized CIGSSe film. The film was fabricated by selenizing the CIGS nanoparticle film as described in our previous work.<sup>[41]</sup>

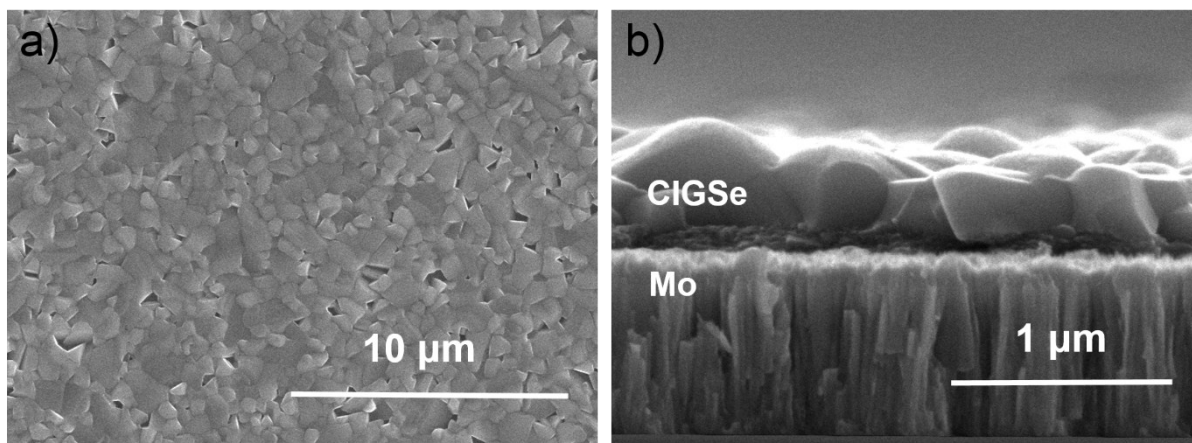

Figure S2. a) Top-view SEM image, and b) cross-section SEM image of the ultrathin CIGSe/Mo/glass thin film after selenization

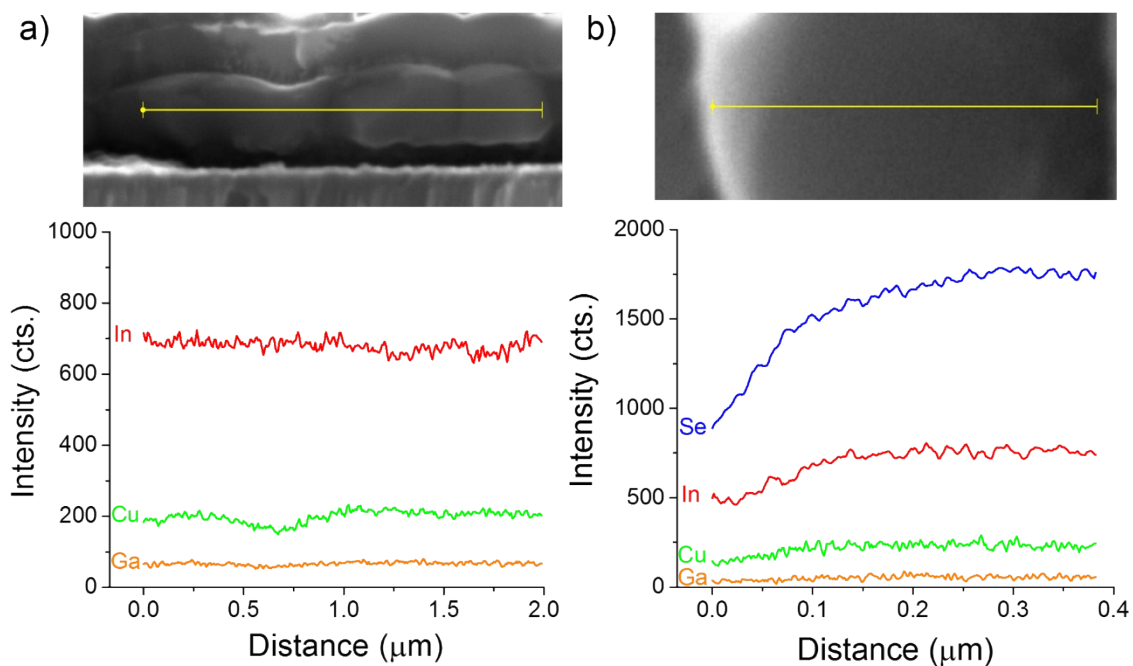

Figure S3. a) Horizontal and b) vertical (from top to the bottom (Mo) side) EDX line scans of the ultrathin CIGSe solar cell

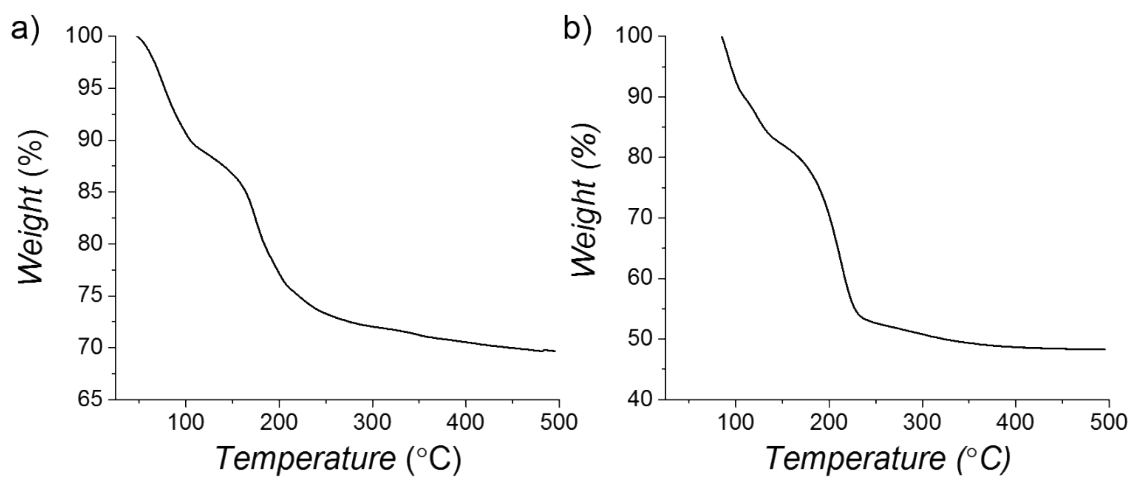

Figure S4. Thermogravimetric analysis (TGA) of room temperature dried a) Cu<sub>2</sub>Se precursor and b) CIGSe precursor. (10 °C/min ramp rate, helium atmosphere)

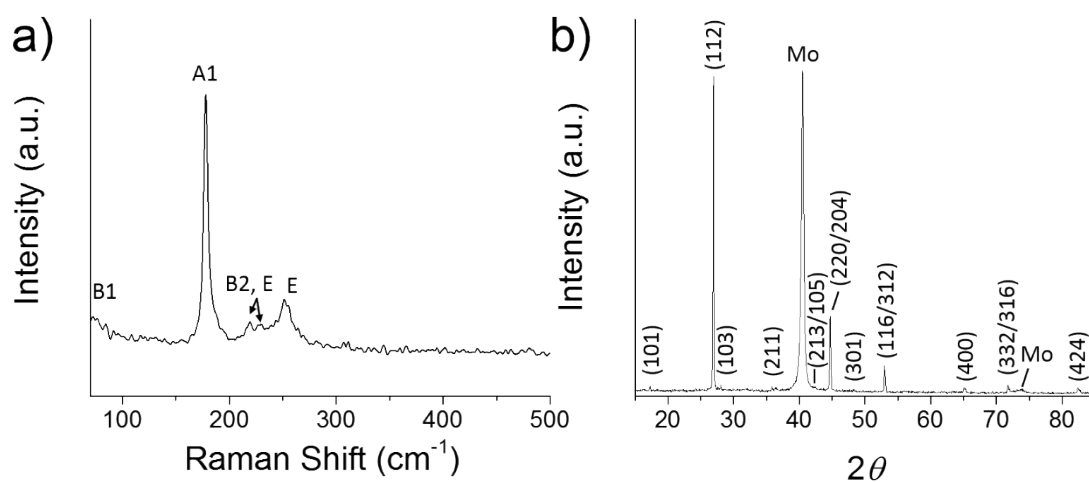

Figure S5. a) Raman spectrum and b) XRD diffraction pattern of the modified CIGSe/Mo/glass film after selenization. Absence of shoulder at 150-160  $\text{cm}^{-1}$  in Raman and the peak at  $25.9^\circ$  in PXRD indicates substantial reduction in OVC.

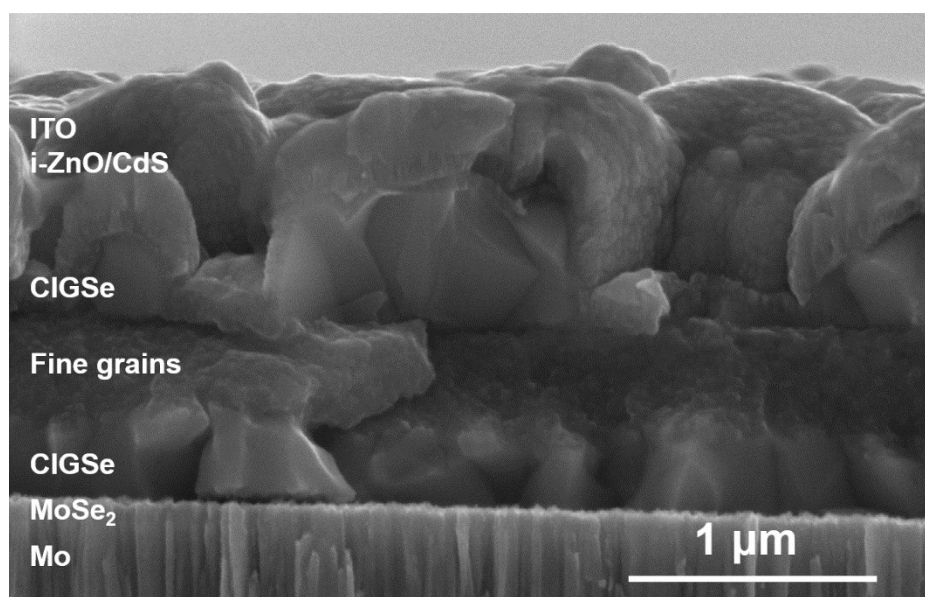

Figure S6. Cross-sectional SEM image of a typical sandwich-structured CIGSe solar cell.

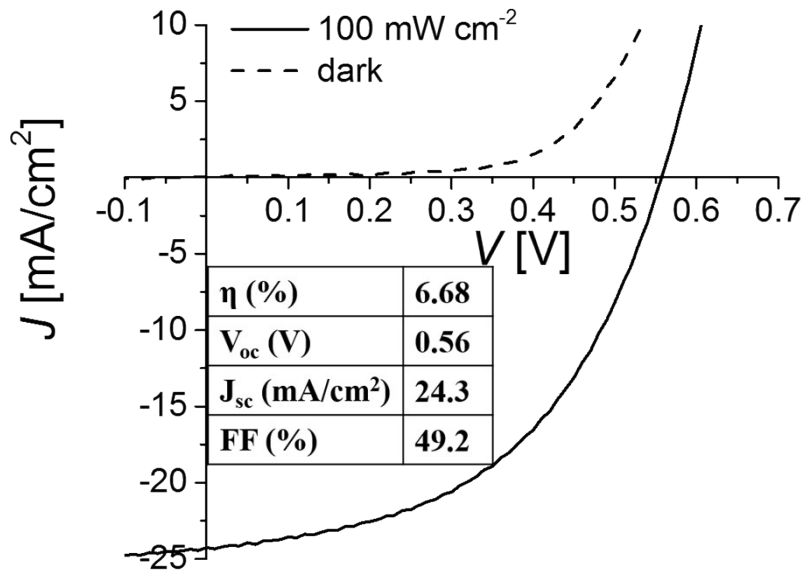

Figure S7.  $J$ - $V$  curves and performance parameters for the sandwich-structured CIGSe solar cell without antireflective layer (AM 1.5G illumination; 100mW cm<sup>-2</sup>; 0.47 cm<sup>2</sup> total device area including Ni/Al grid-covered area).

Table S2. Photovoltaic parameters of 4 ultrathin CIGSe solar cells.

| Cell | $\eta$ (%) | $V_{oc}$ (mV) | FF (%) | $J_{sc}$ (mA/cm <sup>2</sup> ) |
|------|------------|---------------|--------|--------------------------------|
| 1    | 10.30      | 540           | 59     | 32.7                           |
| 2    | 9.67       | 550           | 61     | 28.7                           |
| 3    | 9.68       | 540           | 63     | 28.3                           |
| 4    | 9.86       | 560           | 64     | 27.7                           |
| AVG  | 9.88       | 548           | 62     | 29.4                           |

Table S3. Photovoltaic parameters of 3 modified CIGSe solar cells.

| Cell | $\eta$ (%) | $V_{oc}$ (mV) | $FF$ (%) | $J_{sc}$ (mA/cm <sup>2</sup> ) |
|------|------------|---------------|----------|--------------------------------|
| 1    | 11.10      | 540           | 64.6     | 31.9                           |
| 2    | 12.1       | 560           | 66.1     | 32.7                           |
| 3    | 12.20      | 560           | 65.4     | 33.3                           |
| AVG  | 11.8       | 553           | 65.4     | 32.6                           |

Table S4. Composition of the as prepared selenized CIGSe film from different cation precursors

| Different types of cation precursors                                  | Atomic ratio     |                  |
|-----------------------------------------------------------------------|------------------|------------------|
|                                                                       | [Cu]/([In]+[Ga]) | [Ga]/([In]+[Ga]) |
| CuCl, InCl <sub>3</sub> , Ga(acac) <sub>3</sub>                       | 0.98             | 0.07             |
| CuCl, InCl <sub>3</sub> , Ga(acac) <sub>3</sub> <sup>a</sup>          | 0.99             | 0.04             |
| CuCl, InCl <sub>3</sub> , GaCl <sub>3</sub>                           | 1.24             | 0.05             |
| CuCl, InCl <sub>3</sub> , GaI <sub>3</sub>                            | 1.18             | 0.13             |
| CuCl, In(acac) <sub>3</sub> , Ga(acac) <sub>3</sub>                   | 1.02             | 0.06             |
| Cu(acac) <sub>2</sub> , InCl <sub>3</sub> , Ga(acac) <sub>3</sub>     | 1.06             | 0.08             |
| Cu(acac) <sub>2</sub> , In(acac) <sub>3</sub> , Ga(acac) <sub>3</sub> | 0.94             | 0.29             |
| Cu <sub>2</sub> Se, In(OAc) <sub>3</sub> , Ga(acac) <sub>3</sub>      | 0.93             | 0.30             |

<sup>a</sup> Atomic ratio of cation precursors is [Cu]:[In]:[Ga] = 0.92:0.5:0.5 in the precursor solution. For all other precursor solutions, [Cu]:[In]:[Ga] = 0.92:0.7:0.3.

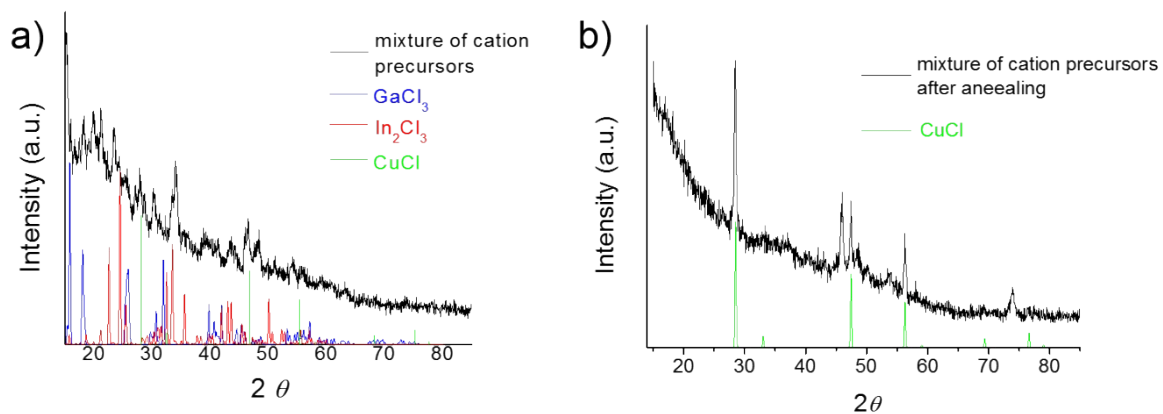

Figure S8. XRD diffraction patterns of the  $\text{CuCl}$ ,  $\text{InCl}_3$ ,  $\text{Ga}(\text{acac})_3$  precursors films on Mo-coated glass by drop casting a) at room temperature; b) after annealing at  $250^\circ\text{C}$  for 5min
